# Supplementary material for: Synthesis and single-particle photophysics of BaZrS 3 chalcogenide perovskite quantum dots
Source: Royal Society of Chemistry journal article supplement (doi:10.1039/d5nr05045f), 2025-12-16
Supplement: d5nr05045f1.pdf [file d5nr05045f1.pdf]

## Supplementary Information

Toranosuke Takagi<sup>a</sup>, Yoshinori Kimoto<sup>b</sup>, Nithin Pathoor<sup>a</sup>, Shun Omagari<sup>a</sup>, Tadashi Kawamoto<sup>a</sup>,  
Takuya Kato<sup>b</sup>, Hiroaki Nakamura<sup>b</sup>, Issei Takenaka<sup>b</sup>, Martin Vacha<sup>a\*</sup>

<sup>a</sup>Department of Materials Science and Engineering, School of Materials and Chemical Technology,  
Institute of Science Tokyo, Ookayama 2-12-1, Meguro-ku, 152-8552 Tokyo, Japan

<sup>b</sup>Advanced Technology Research Laboratories, Idemitsu Kosan Co., Ltd., 1280 Kami-izumi,  
Sodegaura, Chiba 299-0293, Japan

## Contents

Figure S1: HRTEM image and its corresponding fast Fourier transform (FFT) pattern

Figure S2: XPS spectra

Figure S3: Additional PL intensity time traces at each excitation power

Figure S4: Distributions of the short and long PL lifetime components from single QDs

Figure S5: Ligand engineering using DDAS ligand

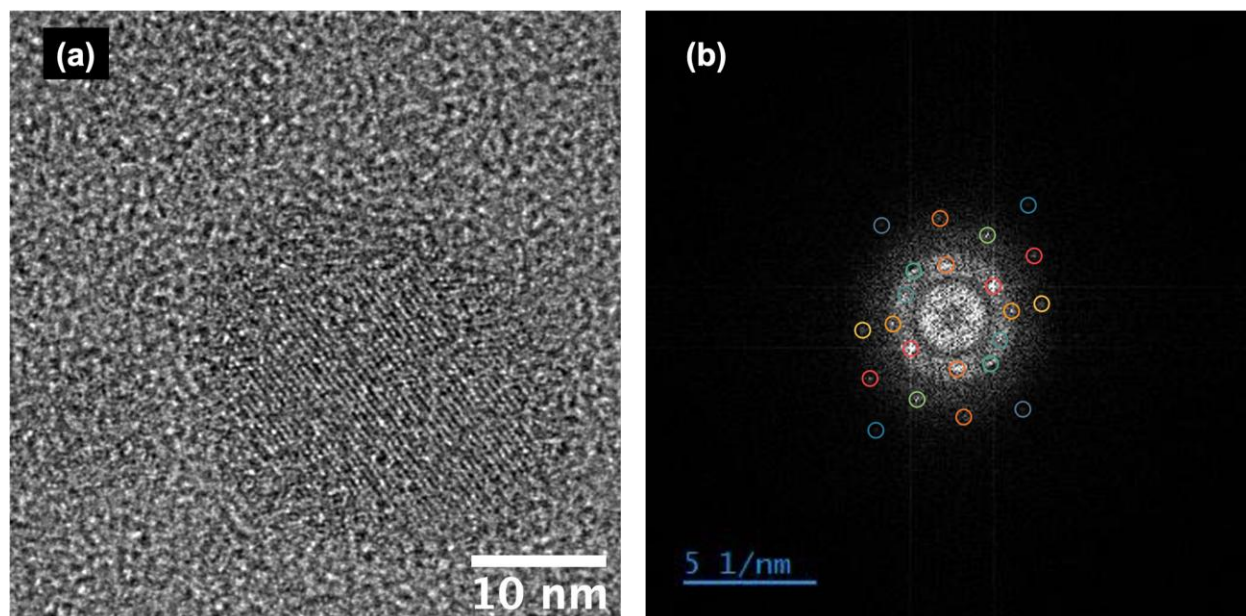

**Fig. S1.** (a) HRTEM image of a QD and (b) its corresponding fast Fourier transform (FFT) pattern calculated from the  $15\text{ nm} \times 15\text{ nm}$  area. In (b), the diffraction spots are grouped by color-coded rings according to their crystallographic orientation, indicating the polycrystalline nature of the QD.

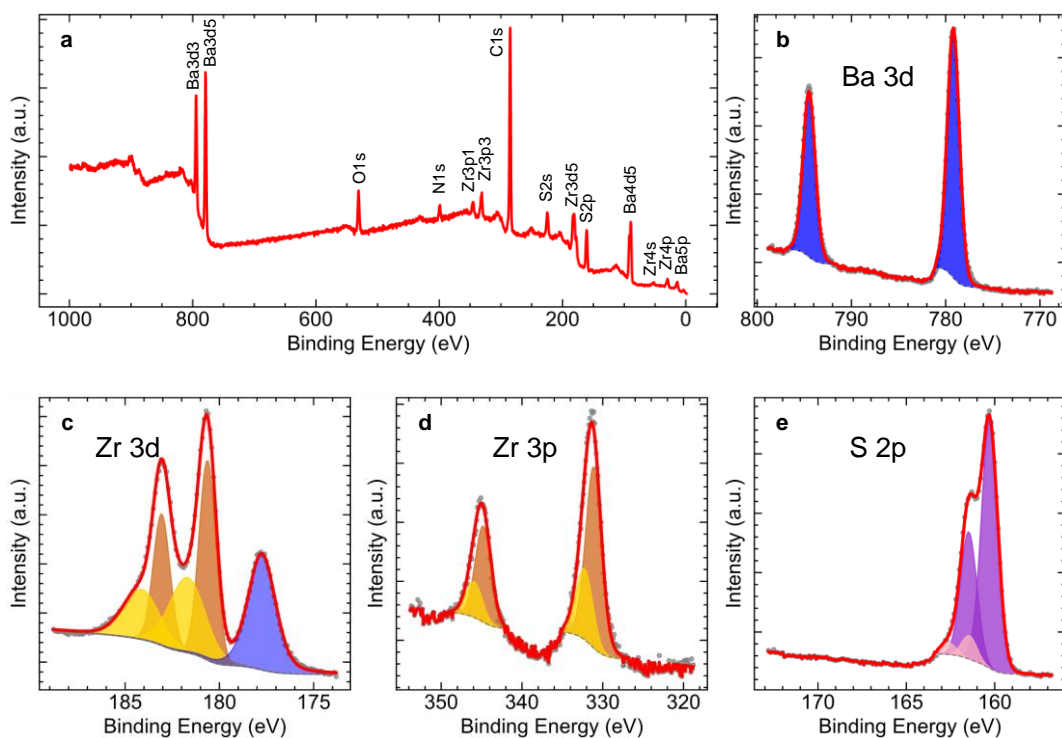

**Fig. S2.** High-resolution XPS spectra. **a)** Wide survey scan; Spectra of **b)** Ba 3d; **c)** Zr 3d; **d)** Zr 3p; **e)** S 2p core levels

X-ray photoelectron spectroscopy (XPS) measurements were performed using a monochromatic Al K $\alpha$  radiation source. Survey spectra were acquired with a pass energy of 187.85 eV and a step size of 0.5 eV, while high-resolution spectra were collected with a pass energy of 23.50 eV and a step size of 0.1 eV. The binding energy scale was calibrated by referencing the aliphatic C 1s peak to 284.8 eV. The samples were prepared by spin-coating the colloidal solution onto glass substrates.

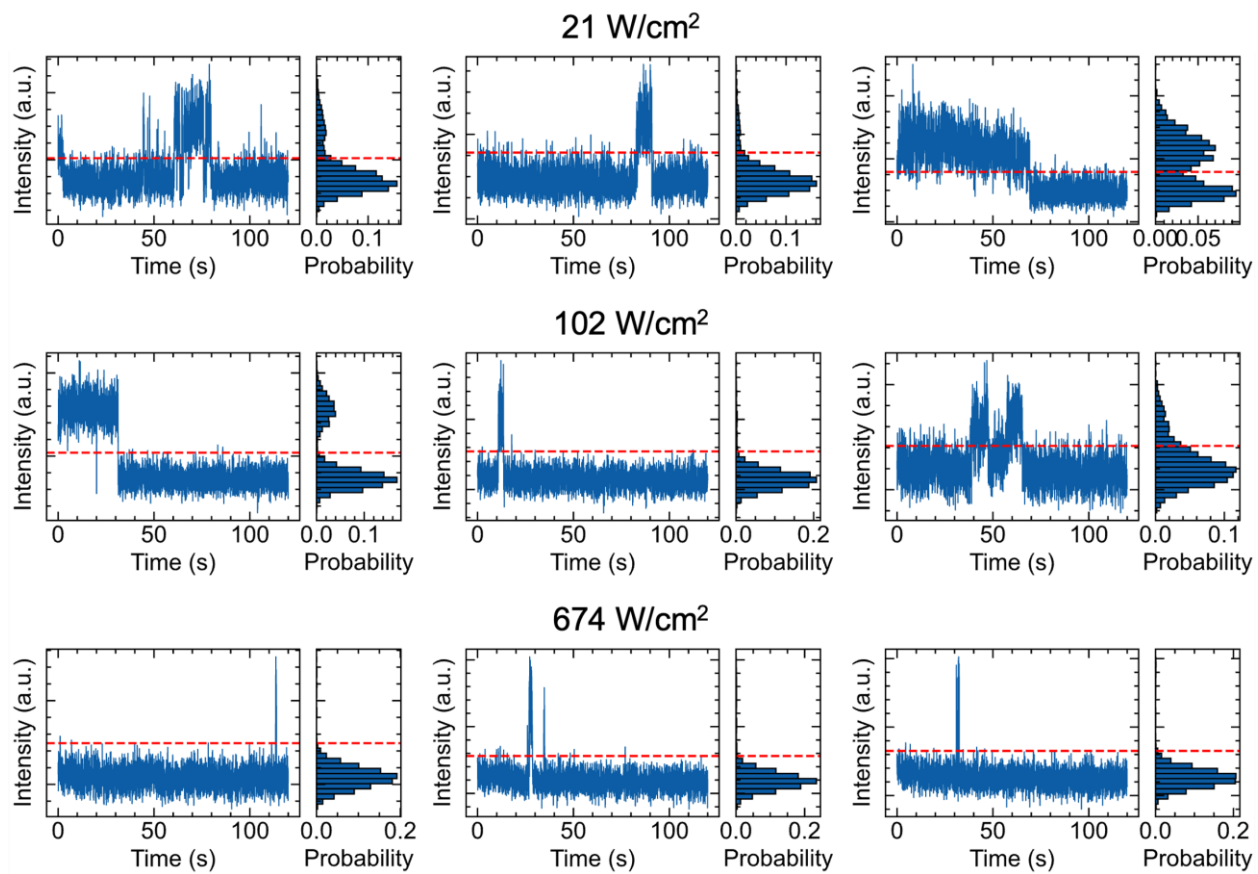

**Fig. S3.** Representative PL intensity time traces and corresponding intensity histograms of single BaZrS<sub>3</sub> QDs showing blinking behavior. The excitation powers are 21 W/cm<sup>2</sup> (top row), 102 W/cm<sup>2</sup> (middle row), and 674 W/cm<sup>2</sup> (bottom row).

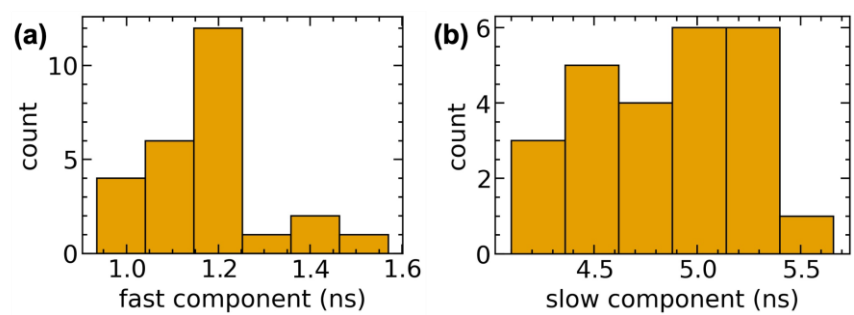

**Fig. S4.** Distribution of fast (a) and slow (b) PL lifetime components measured for 26 individual BaZrS<sub>3</sub> QDs.

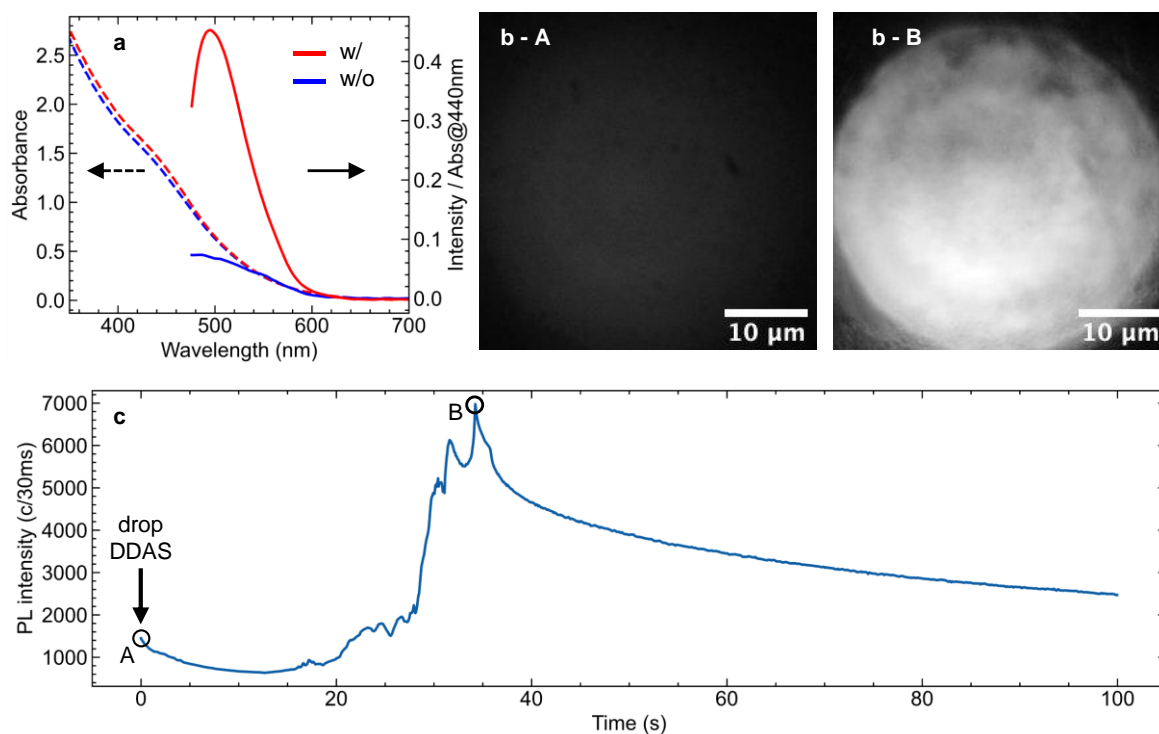

**Fig. S5.** Ligand engineering using DDAS. **a)** Absorption (dashed) and PL (full line) spectra of the BaZrS<sub>3</sub> QD solution before (blue) and after (red) adding a toluene solution of DDAB; **b)** Microscopic PL images of BaZrS<sub>3</sub> QD dispersion on glass before (A) and ~ 35 s after (B) dropping a DCM solution of DDAB; **c)** Time evolution of PL intensity integrated from the whole microscopic view-field after dropping the DCM solution of DDAB; the points A and B correspond to the images in **b)**; the PL intensity decline at longer time is caused by photobleaching.
